# Supplementary material for: Multidrug-resistant Shigella flexneri outbreak associated with a high-mortality spillover event into nonhuman primates
Source: Research Square preprint supplement (doi:10.21203/rs.3.rs-4682172/v1), 2024-07-12
Supplement: Supplementary file 1 [file 28172806e397a7accb9af315.xlsx]

## Sheet: Sheet1
sequence_ID	PulseNET_ID	accession	Status	Collection_Year	State
SRR20006010_Human_NM_2022	PNUSAE106474	SRR20006010	Sporadic	2022	NM
SRR21468809_Human_NM_2022	PNUSAE113312	SRR21468809	Sporadic	2022	NM
SRR14760173_Human_NM_2021	PNUSAE074146	SRR14760173	MSM	2021	NM
SRR14752273_Human_NM_2021	PNUSAE074025	SRR14752273	MSM	2021	NM
SRR14993601_Human_NM_2021	PNUSAE075750	SRR14993601	PEH	2021	NM
SRR14994818_Human_NM_2021	PNUSAE075751	SRR14994818	MSM	2021	NM
SRR15060909_Human_NM_2021	PNUSAE076354	SRR15060909	MSM	2021	NM
SRR15103314_Human_NM_2021	PNUSAE076676	SRR15103314	Sporadic	2021	NM
SRR15508380_Human_NM_2021	PNUSAE080391	SRR15508380	PEH	2021	NM
SRR16773444_NHPrimate_NM_2021	PNUSAE082127	SRR16773444	Non-Human Primate	2021	NM
SRR16773443_NHPrimate_NM_2021	PNUSAE082126	SRR16773443	Non-Human Primate	2021	NM
SRR15693031_Human_NM_2021	PNUSAE082128	SRR15693031	Sporadic	2021	NM
SRR15826273_Human_NM_2021	PNUSAE082773	SRR15826273	PEH Adjacent	2021	NM
SRR15986990_Human_NM_2021	PNUSAE083715	SRR15986990	PEH	2021	NM
SRR15986971_Human_NM_2021	PNUSAE083714	SRR15986971	Sporadic	2021	NM
SRR16089429_Human_NM_2021	PNUSAE084467	SRR16089429	PEH Adjacent	2021	NM
SRR15986993_Human_NM_2021	PNUSAE083713	SRR15986993	PEH	2021	NM
SRR16089430_Human_NM_2021	PNUSAE084469	SRR16089430	PEH	2021	NM
SRR16089517_Human_NM_2021	PNUSAE084465	SRR16089517	PEH Adjacent	2021	NM
SRR16203520_Human_NM_2021	PNUSAE085422	SRR16203520	Daycare	2021	NM
SRR16634204_Human_NM_2021	PNUSAE087792	SRR16634204	Sporadic	2021	NM
SRR16203529_Human_NM_2021	PNUSAE085423	SRR16203529	Sporadic	2021	NM
SRR16563358_Human_NM_2021	PNUSAE087123	SRR16563358	Sporadic	2021	NM
SRR16563498_Human_NM_2021	PNUSAE087122	SRR16563498	Sporadic	2021	NM
SRR16562755_Human_NM_2021	PNUSAE087124	SRR16562755	Sporadic	2021	NM
SRR16634554_Human_NM_2021	PNUSAE087790	SRR16634554	Sporadic	2021	NM
SRR16634605_Human_NM_2021	PNUSAE087791	SRR16634605	PEH	2021	NM
SRR16612792_Human_NM_2021	PNUSAE087728	SRR16612792	Sporadic	2021	NM
SRR16772076_Human_NM_2021	PNUSAE088355	SRR16772076	Sporadic	2021	NM
SRR16947718_Human_NM_2021	PNUSAE089082	SRR16947718	PEH	2021	NM
SRR17009538_Human_NM_2021	PNUSAE089763	SRR17009538	Sporadic	2021	NM
SRR17009539_Human_NM_2021	PNUSAE089764	SRR17009539	PEH	2021	NM
SRR17009537_Human_NM_2021	PNUSAE089762	SRR17009537	Sporadic	2021	NM
SRR17009536_Human_NM_2021	PNUSAE089761	SRR17009536	PEH	2021	NM
SRR17100090_Human_NM_2021	PNUSAE090420	SRR17100090	PEH	2021	NM
SRR17100118_Human_NM_2021	PNUSAE090418	SRR17100118	PEH	2021	NM
SRR17100088_Human_NM_2021	PNUSAE090419	SRR17100088	PEH	2021	NM
SRR17100247_Human_NM_2021	PNUSAE090416	SRR17100247	PEH	2021	NM
SRR17100130_Human_NM_2021	PNUSAE090415	SRR17100130	PEH	2021	NM
SRR17179911_Human_NM_2021	PNUSAE091028	SRR17179911	PEH	2021	NM
SRR17179909_Human_NM_2021	PNUSAE091030	SRR17179909	Sporadic	2021	NM
SRR17179910_Human_NM_2021	PNUSAE091027	SRR17179910	PEH	2021	NM
SRR17239971_Human_NM_2021	PNUSAE091422	SRR17239971	PEH	2021	NM
SRR17240352_Human_NM_2021	PNUSAE091421	SRR17240352	Sporadic	2021	NM
SRR17335834_Human_NM_2021	PNUSAE092077	SRR17335834	PEH	2021	NM
SRR17335831_Human_NM_2021	PNUSAE092078	SRR17335831	PEH	2021	NM
SRR17335832_Human_NM_2021	PNUSAE092079	SRR17335832	PEH	2021	NM
SRR17335830_Human_NM_2021	PNUSAE092082	SRR17335830	PEH	2021	NM
SRR17335835_Human_NM_2021	PNUSAE092081	SRR17335835	Sporadic	2021	NM
SRR17335833_Human_NM_2021	PNUSAE092080	SRR17335833	Sporadic	2021	NM
SRR17410054_Human_NM_2021	PNUSAE092342	SRR17410054	PEH Adjacent	2021	NM
SRR17410208_Human_NM_2021	PNUSAE092341	SRR17410208	PEH	2021	NM
SRR17838874_Human_NM_2022	PNUSAE093924	SRR17838874	PEH	2022	NM
SRR17838858_Human_NM_2022	PNUSAE093921	SRR17838858	Sporadic	2022	NM
SRR17838865_Human_NM_2022	PNUSAE093919	SRR17838865	Sporadic	2022	NM
SRR17838888_Human_NM_2022	PNUSAE093922	SRR17838888	Sporadic	2022	NM
SRR17838860_Human_NM_2022	PNUSAE093923	SRR17838860	PEH	2022	NM
SRR18170978_Human_NM_2022	PNUSAE095308	SRR18170978	PEH	2022	NM
SRR18521877_Human_NM_2022	PNUSAE097543	SRR18521877	PEH Adjacent	2022	NM
SRR18605040_Human_NM_2022	PNUSAE097867	SRR18605040	Sporadic	2022	NM
SRR18735297_Human_NM_2022	PNUSAE098243	SRR18735297	PEH	2022	NM
SRR18735296_Human_NM_2022	PNUSAE098242	SRR18735296	PEH	2022	NM
SRR18925511_Human_NM_2022	PNUSAE099413	SRR18925511	Sporadic	2022	NM
SRR19172446_Human_NM_2022	PNUSAE100899	SRR19172446	Sporadic	2022	NM
SRR19172538_Human_NM_2022	PNUSAE100898	SRR19172538	MSM	2022	NM
SRR19226358_Human_NM_2022	PNUSAE101260	SRR19226358	PEH/MSM	2022	NM
SRR19379263_Human_NM_2022	PNUSAE102005	SRR19379263	PEH	2022	NM
SRR19649563_Human_NM_2022	PNUSAE103880	SRR19649563	Sporadic	2022	NM
SRR19649532_Human_NM_2022	PNUSAE103879	SRR19649532	PEH	2022	NM
SRR19645277_Human_NM_2022	PNUSAE103862	SRR19645277	PEH	2022	NM
SRR19645280_Human_NM_2022	PNUSAE103863	SRR19645280	PEH	2022	NM
SRR19846546_Human_NM_2022	PNUSAE105229	SRR19846546	Sporadic	2022	NM
SRR19846537_Human_NM_2022	PNUSAE105227	SRR19846537	MSM	2022	NM
SRR19870152_Human_NM_2022	PNUSAE105559	SRR19870152	Sporadic	2022	NM
SRR20006012_Human_NM_2022	PNUSAE106476	SRR20006012	MSM	2022	NM
SRR20082111_NHPrimate_NM_2022	PNUSAE106916	SRR20082111	Non-Human Primate	2022	NM
SRR20649173_Human_NM_2022	PNUSAE108484	SRR20649173	PEH	2022	NM
SRR20649175_Human_NM_2022	PNUSAE108482	SRR20649175	PEH	2022	NM
SRR21025669_Human_NM_2022	PNUSAE110152	SRR21025669	Sporadic	2022	NM
SRR21006424_Human_NM_2022	PNUSAE109832	SRR21006424	PEH	2022	NM
SRR21006412_Human_NM_2022	PNUSAE109829	SRR21006412	PEH	2022	NM
SRR21006413_Human_NM_2022	PNUSAE109833	SRR21006413	PEH	2022	NM
SRR21006422_Human_NM_2022	PNUSAE109834	SRR21006422	PEH	2022	NM
SRR21003523_Human_NM_2022	PNUSAE109831	SRR21003523	PEH	2022	NM
SRR21006425_Human_NM_2022	PNUSAE109828	SRR21006425	PEH	2022	NM
SRR21091679_Human_NM_2022	PNUSAE110714	SRR21091679	Sporadic	2022	NM
SRR21228230_Human_NM_2022	PNUSAE111684	SRR21228230	Sporadic	2022	NM
SRR21228252_Human_NM_2022	PNUSAE111683	SRR21228252	PEH	2022	NM
SRR21468845_Human_NM_2022	PNUSAE113310	SRR21468845	PEH	2022	NM
SRR21593495_Human_NM_2022	PNUSAE114013	SRR21593495	PEH	2022	NM
SRR21593504_Human_NM_2022	PNUSAE114011	SRR21593504	Sporadic	2022	NM
SRR21642970_Human_NM_2022	PNUSAE114669	SRR21642970	PEH	2022	NM
SRR21642972_Human_NM_2022	PNUSAE114667	SRR21642972	Sporadic	2022	NM
SRR21642971_Human_NM_2022	PNUSAE114668	SRR21642971	PEH	2022	NM
SRR21713970_Human_NM_2022	PNUSAE115434	SRR21713970	PEH Adjacent	2022	NM
SRR21713941_Human_NM_2022	PNUSAE115427	SRR21713941	Sporadic	2022	NM
SRR21713936_Human_NM_2022	PNUSAE115429	SRR21713936	PEH	2022	NM
SRR21714700_Human_NM_2022	PNUSAE115432	SRR21714700	Sporadic	2022	NM
SRR21817298_Human_NM_2022	PNUSAE116065	SRR21817298	PEH	2022	NM
SRR21713972_Human_NM_2022	PNUSAE115426	SRR21713972	Daycare	2022	NM
SRR21817292_Human_NM_2022	PNUSAE116069	SRR21817292	Sporadic	2022	NM
SRR21817297_Human_NM_2022	PNUSAE116066	SRR21817297	PEH Adjacent	2022	NM
SRR21817284_Human_NM_2022	PNUSAE116072	SRR21817284	Sporadic	2022	NM
SRR21817289_Human_NM_2022	PNUSAE116074	SRR21817289	Sporadic	2022	NM
SRR21817291_Human_NM_2022	PNUSAE116075	SRR21817291	Sporadic	2022	NM
SRR22026036_Human_NM_2022	PNUSAE118324	SRR22026036	PEH	2022	NM
SRR21877337_Human_NM_2022	PNUSAE117169	SRR21877337	Sporadic	2022	NM
SRR21817294_Human_NM_2022	PNUSAE116068	SRR21817294	Sporadic	2022	NM
SRR21877335_Human_NM_2022	PNUSAE117176	SRR21877335	Sporadic	2022	NM
SRR21877338_Human_NM_2022	PNUSAE117167	SRR21877338	PEH	2022	NM
SRR22142802_Human_NM_2022	PNUSAE119258	SRR22142802	Sporadic	2022	NM
SRR21877336_Human_NM_2022	PNUSAE117168	SRR21877336	Sporadic	2022	NM
SRR22142792_Human_NM_2022	PNUSAE119281	SRR22142792	PEH	2022	NM
SRR21949103_Human_NM_2022	PNUSAE117828	SRR21949103	Sporadic	2022	NM
SRR22246786_Human_NM_2022	PNUSAE119877	SRR22246786	PEH	2022	NM
SRR21949100_Human_NM_2022	PNUSAE117827	SRR21949100	Sporadic	2022	NM
SRR21949097_Human_NM_2022	PNUSAE117825	SRR21949097	Sporadic	2022	NM
SRR22363341_Human_NM_2022	PNUSAE121023	SRR22363341	PEH	2022	NM
SRR22142807_Human_NM_2022	PNUSAE119268	SRR22142807	Sporadic	2022	NM
SRR22246773_Human_NM_2022	PNUSAE119873	SRR22246773	PEH	2022	NM
SRR22363342_Human_NM_2022	PNUSAE121025	SRR22363342	PEH	2022	NM
SRR21949105_Human_NM_2022	PNUSAE117826	SRR21949105	Sporadic	2022	NM
SRR22246782_Human_NM_2022	PNUSAE119881	SRR22246782	PEH	2022	NM
SRR22142805_Human_NM_2022	PNUSAE119267	SRR22142805	PEH	2022	NM
SRR21949088_Human_NM_2022	PNUSAE117833	SRR21949088	Sporadic	2022	NM
SRR22142791_Human_NM_2022	PNUSAE119270	SRR22142791	PEH	2022	NM
SRR22142784_Human_NM_2022	PNUSAE119284	SRR22142784	Sporadic	2022	NM
SRR22142788_Human_NM_2022	PNUSAE119276	SRR22142788	PEH	2022	NM
SRR22142790_Human_NM_2022	PNUSAE119278	SRR22142790	PEH	2022	NM
SRR22142795_Human_NM_2022	PNUSAE119277	SRR22142795	Sporadic	2022	NM
SRR22143586_Human_NM_2022	PNUSAE119275	SRR22143586	PEH	2022	NM
SRR22142804_Human_NM_2022	PNUSAE119263	SRR22142804	PEH	2022	NM
SRR22142786_Human_NM_2022	PNUSAE119266	SRR22142786	Sporadic	2022	NM
SRR22142783_Human_NM_2022	PNUSAE119265	SRR22142783	Sporadic	2022	NM
SRR22246787_Human_NM_2022	PNUSAE119872	SRR22246787	Sporadic	2022	NM
SRR22246784_Human_NM_2022	PNUSAE119871	SRR22246784	Sporadic	2022	NM
SRR22246777_Human_NM_2022	PNUSAE119870	SRR22246777	Sporadic	2022	NM
SRR22246783_Human_NM_2022	PNUSAE119875	SRR22246783	Sporadic	2022	NM
SRR22246776_Human_NM_2022	PNUSAE119876	SRR22246776	Sporadic	2022	NM
SRR22363315_Human_NM_2022	PNUSAE121022	SRR22363315	Sporadic	2022	NM
SRR22287659_Human_NM_2022	PNUSAE120462	SRR22287659	PEH	2022	NM
SRR22287660_Human_NM_2022	PNUSAE120463	SRR22287660	PEH	2022	NM
SRR22363337_Human_NM_2022	PNUSAE121029	SRR22363337	PEH	2022	NM
SRR22363339_Human_NM_2022	PNUSAE121027	SRR22363339	PEH	2022	NM
SRR22363338_Human_NM_2022	PNUSAE121026	SRR22363338	PEH Adjacent	2022	NM
SRR22444592_Human_NM_2022	PNUSAE121541	SRR22444592	Sporadic	2022	NM
SRR22444593_Human_NM_2022	PNUSAE121537	SRR22444593	PEH	2022	NM
SRR22444612_Human_NM_2022	PNUSAE121542	SRR22444612	Sporadic	2022	NM
SRR22444610_Human_NM_2022	PNUSAE121540	SRR22444610	PEH Adjacent	2022	NM
SRR22444611_Human_NM_2022	PNUSAE121547	SRR22444611	Sporadic	2022	NM
SRR22721123_Human_NM_2022	PNUSAE122932	SRR22721123	PEH	2022	NM
SRR22721122_Human_NM_2022	PNUSAE122931	SRR22721122	Daycare	2022	NM
SRR22721121_Human_NM_2022	PNUSAE122928	SRR22721121	Sporadic	2022	NM
SRR22721114_Human_NM_2022	PNUSAE122930	SRR22721114	PEH	2022	NM
SRR22721131_Human_NM_2022	PNUSAE122935	SRR22721131	Sporadic	2022	NM
SRR22721113_Human_NM_2022	PNUSAE122934	SRR22721113	PEH	2022	NM
SRR22902417_Human_NM_2022	PNUSAE123892	SRR22902417	Sporadic	2022	NM
SRR22989388_Human_NM_2022	PNUSAE124387	SRR22989388	MSM	2022	NM
SRR22989387_Human_NM_2022	PNUSAE124388	SRR22989387	Sporadic	2022	NM
SRR22989356_Human_NM_2022	PNUSAE124389	SRR22989356	Sporadic	2022	NM
SRR23285869_Human_NM_2022	PNUSAE126315	SRR23285869	PEH	2022	NM
SRR23204000_Human_NM_2022	PNUSAE125773	SRR23204000	PEH	2022	NM
SRR23285914_Human_NM_2023	PNUSAE126316	SRR23285914	Sporadic	2023	NM
SRR23558660_Human_NM_2023	PNUSAE127996	SRR23558660	PEH	2023	NM
SRR23646546_Human_NM_2023	PNUSAE128708	SRR23646546	PEH Adjacent	2023	NM
SRR23721338_Human_NM_2023	PNUSAE129222	SRR23721338	Sporadic	2023	NM
SRR23929212_Human_NM_2023	PNUSAE130422	SRR23929212	PEH	2023	NM
SRR23929217_Human_NM_2023	PNUSAE130424	SRR23929217	PEH	2023	NM
SRR23983931_Human_NM_2023	PNUSAE131045	SRR23983931	Sporadic	2023	NM
SRR24082014_Human_NM_2023	PNUSAE131623	SRR24082014	PEH	2023	NM
SRR24082542_Human_NM_2023	PNUSAE131624	SRR24082542	PEH	2023	NM
SRR24907668_Human_NM_2023	PNUSAE139006	SRR24907668	MSM	2023	NM
SRR24970938_Human_NM_2023	PNUSAE139745	SRR24970938	MSM	2023	NM
SRR25100150_Human_NM_2023	PNUSAE141027	SRR25100150	Daycare	2023	NM
SRR25100364_Human_NM_2023	PNUSAE141029	SRR25100364	Sporadic	2023	NM
SRR25465009_Human_NM_2023	PNUSAE145040	SRR25465009	Daycare	2023	NM
SRR21713938_Human_CO_2022	PNUSAE115430	SRR21713938	Out of State	2022	CO
SRR22246779_Human_AZ_2022	PNUSAE119879	SRR22246779	Out of State	2022	AZ
SRR22142809_Human_WY_2022	PNUSAE119264	SRR22142809	Out of State	2022	WY
SRR22540397_Human_CO_2022	PNUSAE122313	SRR22540397	Out of State	2022	CO
SRR22902087_Human_CO_2022	PNUSAE123845	SRR22902087	Out of State	2022	CO
SRR23030652_Human_CO_2022	PNUSAE124718	SRR23030652	Out of State	2022	CO
SRR23030656_Human_CO_2022	PNUSAE124719	SRR23030656	Out of State	2022	CO
SRR14118839_Human_LA_2021	PNUSAE069509	SRR14118839	Out of State	2021	LA
SRR10197323_Human_LA_2019	PNUSAE035202	SRR10197323	Out of State	2019	LA
SRR14669034_Human_TX_2021	PNUSAE073160	SRR14669034	Out of State	2021	TX
SRR13491516_Human_TX_2020	PNUSAE066977	SRR13491516	Out of State	2020	TX
SRR21200972_Human_TX_2021	PNUSAE088805	SRR21200972	Out of State	2021	TX
SRR24914583_Human_NJ_2023	PNUSAE139039	SRR24914583	Out of State	2023	NJ
SRR25036244_Human_CO_2023	PNUSAE140574	SRR25036244	Out of State	2023	CO
SRR15528898_Human_AZ_2021	PNUSAE080710	SRR15528898	Out of State	2021	AZ
SRR26378720_Human_NM_2023	PNUSAE154646	SRR26378720	PEH	2023	NM
SRR26378717_Human_NM_2023	PNUSAE154644	SRR26378717	Sporadic	2023	NM
SRR26399038_Human_NM_2023	PNUSAE155361	SRR26399038	SPORADIC	2023	NM
SRR26398978_Human_NM_2023	PNUSAE155365	SRR26398978	SPORADIC	2023	NM
SRR26398976_Human_NM_2023	PNUSAE155362	SRR26398976	PEH	2023	NM
SRR26398979_Human_NM_2023	PNUSAE155364	SRR26398979	PEH	2023	NM
SRR26399036_Human_NM_2023	PNUSAE155366	SRR26399036	PEH	2023	NM
SRR26500067_Human_NM_2023	PNUSAE156607	SRR26500067	SPORADIC	2023	NM
SRR26500071_Human_NM_2023	PNUSAE156605	SRR26500071	SPORADIC	2023	NM
SRR26500081_Human_NM_2023	PNUSAE156606	SRR26500081	SPORADIC	2023	NM
SRR26617665_Human_NM_2023	PNUSAE157258	SRR26617665	SPORADIC	2023	NM
SRR26617664_Human_NM_2023	PNUSAE157260	SRR26617664	PEH	2023	NM
SRR26704352_Human_NM_2023	PNUSAE158210	SRR26704352	PEH	2023	NM
SRR26824950_Human_NM_2023	PNUSAE158976	SRR26824950	SPORADIC	2023	NM
SRR26824949_Human_NM_2023	PNUSAE158980	SRR26824949	SPORADIC	2023	NM
SRR26901218_Human_NM_2023	PNUSAE159852	SRR26901218	PEH	2023	NM
SRR26901215_Human_NM_2023	PNUSAE159854	SRR26901215	PEH	2023	NM
SRR26901217_Human_NM_2023	PNUSAE159855	SRR26901217	PEH	2023	NM
SRR27046622_Human_NM_2023	PNUSAE161223	SRR27046622	PEH	2023	NM
SRR26901214_Human_NM_2023	PNUSAE159853	SRR26901214	SPORADIC	2023	NM
SRR26969294_Human_NM_2023	PNUSAE160539	SRR26969294	PEH	2023	NM
SRR26969295_Human_NM_2023	PNUSAE160544	SRR26969295	PEH	2023	NM
SRR26969293_Human_NM_2023	PNUSAE160540	SRR26969293	PEH	2023	NM
SRR26969301_Human_NM_2023	PNUSAE160545	SRR26969301	SPORADIC	2023	NM
SRR26969296_Human_NM_2023	PNUSAE160541	SRR26969296	SPORADIC	2023	NM
SRR27046605_Human_NM_2023	PNUSAE161222	SRR27046605	PEH	2023	NM
SRR27046603_Human_NM_2023	PNUSAE161221	SRR27046603	PEH	2023	NM
SRR27201399_Human_NM_2023	PNUSAE162311	SRR27201399	PEH	2023	NM
SRR27201402_Human_NM_2023	PNUSAE162306	SRR27201402	PEH	2023	NM
SRR27201490_NHPrimate_NM_2023	PNUSAE162303	SRR27201490	Non-Human Primate	2023	NM
