# Supplementary material for: Multidrug-resistant Shigella flexneri outbreak associated with a high-mortality spillover event into nonhuman primates
Source: Research Square preprint supplement (doi:10.21203/rs.3.rs-4682172/v1), 2024-07-12
Supplement: Supplementary file 2 [file b877638b6b49b0cbd19639f0.xlsx]

## Sheet: NM_outbreak_context
SRR_number	SRX	PulseNet ID	State of isolation
SRR10197323	SRX6917465	PNUSAE035202	LA
SRR13491516	SRX9904030	PNUSAE066977	TX
SRR13732983	SRX10120609	PNUSAE067755	CO
SRR13820492	SRX10201154	PNUSAE068387	CA
SRR14118839	SRX10489188:	PNUSAE069509	LA
SRR14147628	SRX10516719	PNUSAE069829	CA
SRR14327320	SRX10705809	PNUSAE071208	TX
SRR14503799	SRX10849775	PNUSAE072016	CO
SRR14669034	SRX11007552	PNUSAE073160	TX
SRR14761479	SRX11094984	PNUSAE074193	CA
SRR14783127	SRX11116430	PNUSAE074307	CA
SRR15103314	SRX11416174	PNUSAE076676	NM
SRR15508380	SRX11807587	PNUSAE080391	NM
SRR15526534	SRX11825255	PNUSAE080624	TX
SRR15571348	SRX11869047	PNUSAE081271	CO
SRR15693031	SRX11989010	PNUSAE082128	NM
SRR15784293	SRX12076764	PNUSAE082654	CO
SRR15909550	SRX12199965	PNUSAE083394	CA
SRR16089429	SRX12375814	PNUSAE084467	NM
SRR16203520	SRX12487874	PNUSAE085422	NM
SRR16634605	SRX12835457	PNUSAE087791	NM
SRR16773443	SRX12972743	PNUSAE082126	NM
SRR16936691	SRX13128694	PNUSAE089005	CA
SRR16989472	SRX13179954	PNUSAE089483	ID
SRR16990218	SRX13180700	PNUSAE089499	CA
SRR17009538	SRX13199711	PNUSAE089763	NM
SRR17035191	SRX13225078	PNUSAE090073	CA
SRR17035193	SRX13225080	PNUSAE090074	CA
SRR17072256	SRX13260748	PNUSAE090240	DC
SRR17240352	SRX13419441	PNUSAE091421	NM
SRR17248391	SRX13427365	PNUSAE091486	UT
SRR17386251	SRX13560332	PNUSAE092299	CA
SRR17398471	SRX13570566	PNUSAE092305	CA
SRR17413651	SRX13585306	PNUSAE092426	CO
SRR17549365	SRX13718815	PNUSAE092768	CA
SRR17591808	SRX13760646	PNUSAE092894	CA
SRR17591810	SRX13760648	PNUSAE092897	CA
SRR17622284	SRX13790706	PNUSAE092966	CA
SRR17656068	SRX13824159	PNUSAE093225	CA
SRR17723120	SRX13885923	PNUSAE093391	CA
SRR17762124	SRX13924542	PNUSAE093511	DC
SRR17887788	SRX14046787	PNUSAE094123	CA
SRR18101030	SRX14251910	PNUSAE095005	CO
SRR18104384	SRX14255264	PNUSAE095094	CA
SRR18208096	SRX14354668	PNUSAE095490	CA
SRR18302117	SRX14439588	PNUSAE096190	CA
SRR18332254	SRX14468732	PNUSAE096388	CO
SRR18455719	SRX14588351	PNUSAE097119	CA
SRR18503108	SRX14634491	PNUSAE097308	OH
SRR18642800	SRX14746057	PNUSAE097937	CO
SRR18642853	SRX14746110	PNUSAE097942	CO
SRR18642859	SRX14746116	PNUSAE097944	CO
SRR18717680	SRX14818078	PNUSAE098145	TX
SRR18797846	SRX14896278	PNUSAE098816	CA
SRR18797888	SRX14896320	PNUSAE098839	CO
SRR18965248	SRX15041672	PNUSAE099715	CA
SRR19038070	SRX15109581	PNUSAE100017	CA
SRR19147684	SRX15214420	PNUSAE100562	CO
SRR19369410	SRX15427883	PNUSAE101918	CA
SRR19423477	SRX15477492	PNUSAE102166	CA
SRR19511036	SRX15563549	PNUSAE102508	CA
SRR19511093	SRX15563606	PNUSAE102505	CA
SRR19537083	SRX15589304	PNUSAE102742	FL
SRR19553108	SRX15605163	PNUSAE103125	TX
SRR19553275	SRX15605330	PNUSAE103133	TX
SRR19654211	SRX15703984	PNUSAE103984	CA
SRR19754562	SRX15799313	PNUSAE104376	CA
SRR19754564	SRX15799315	PNUSAE104374	CA
SRR19769840	SRX15814468	PNUSAE104731	CO
SRR19771100	SRX15815728	PNUSAE104815	CA
SRR19870152	SRX15913536	PNUSAE105559	NM
SRR19986561	SRX16028667	PNUSAE106211	CO
SRR19990439	SRX16032474	PNUSAE106327	CA
SRR19996546	SRX16037554	PNUSAE106370	NY
SRR19996556	SRX16037564	PNUSAE106362	NY
SRR20006012	SRX16046821	PNUSAE106476	NM
SRR20082111	SRX16119886	PNUSAE106916	NM
SRR20082340	SRX16120041	PNUSAE107015	TX
SRR20082428	SRX16120129	PNUSAE107040	CA
SRR20313863	SRX16347139	PNUSAE107760	CA
SRR20318862	SRX16352090	PNUSAE107861	CA
SRR20342597	SRX16375558	PNUSAE101533	CA
SRR20423102	SRX16455696	PNUSAE108092	CA
SRR20652444	SRX16675514	PNUSAE108463	CA
SRR21023896	SRX17040201	PNUSAE107512	PR
SRR21031403	SRX17046894	PNUSAE109549	TX
SRR21085583	SRX17100530	PNUSAE110613	CO
SRR21200972	SRX17211973	PNUSAE088805	TX
SRR21229808	SRX17239968	PNUSAE109322	UT
SRR21235341	SRX17245427	PNUSAE112091	CA
SRR21593504	SRX17595216	PNUSAE114011	NM
SRR21713938	SRX17711303	PNUSAE115430	NM
SRR21714700	SRX17712041	PNUSAE115432	NM
SRR21832854	SRX17821997	PNUSAE116589	CA
SRR21853729	SRX17842239	PNUSAE116918	TX
SRR21854249	SRX17842759	PNUSAE116945	CO
SRR21877335	SRX17864448	PNUSAE117176	NM
SRR21936744	SRX17920616	PNUSAE117769	TX
SRR21949103	SRX17932843	PNUSAE117828	NM
SRR21958809	SRX17942397	PNUSAE117893	CA
SRR22026670	SRX18008144	PNUSAE118237	TX
SRR22042387	SRX18023524	PNUSAE118545	CA
SRR22132646	SRX18112218	PNUSAE119208	CA
SRR22142792	SRX18122112	PNUSAE119281	NM
SRR22312317	SRX18285822	PNUSAE120502	NV
SRR22373457	SRX18343981	PNUSAE121079	TX
SRR22373458	SRX18344478	PNUSAE121078	TX
SRR22444611	SRX18413533	PNUSAE121547	NM
SRR22486387	SRX18451555	PNUSAE121871	TX
SRR22512347	SRX18476867	PNUSAE122022	CA
SRR22538159	SRX18502147	PNUSAE122331	CA
SRR22540397	SRX18504385	PNUSAE122313	CO
SRR22721122	SRX18682650	PNUSAE122931	NM
SRR22811863	SRX18771563	PNUSAE123360	TX
SRR22811865	SRX18771565	PNUSAE123359	TX
SRR22828560	SRX18787926	PNUSAE123619	CA
SRR22853639	SRX18812432	PNUSAE123657	MA
SRR22902087	SRX18859707	PNUSAE123845	CO
SRR22902417	SRX18859943	PNUSAE123892	NM
SRR22929458	SRX18886806	PNUSAE122641	NH
SRR22950074	SRX18907300	PNUSAE124023	TX
SRR23030652	SRX18985415	PNUSAE124718	CO
SRR23030656	SRX18985419	PNUSAE124719	CO
SRR23097776	SRX19050173	PNUSAE125166	MA
SRR23101678	SRX19053639	PNUSAE125324	CO
SRR23204001	SRX19152385	PNUSAE125775	NM
SRR23285914	SRX19229242	PNUSAE126316	NM
SRR23332830	SRX19275014	PNUSAE126699	TX
